# Supplementary material for: Fortetropin supplementation prevents the rise in circulating myostatin but not disuse-induced muscle atrophy in young men with limb immobilization: A randomized controlled trial
Source: PubMed Central journal article supplement (PMC10204970; doi:10.1371/journal.pone.0286222), 2023-05-23

All blots were analyzed using Image Lab version 6.1 (Rio-Rad)

Total protein content for normalization (**Total form**)

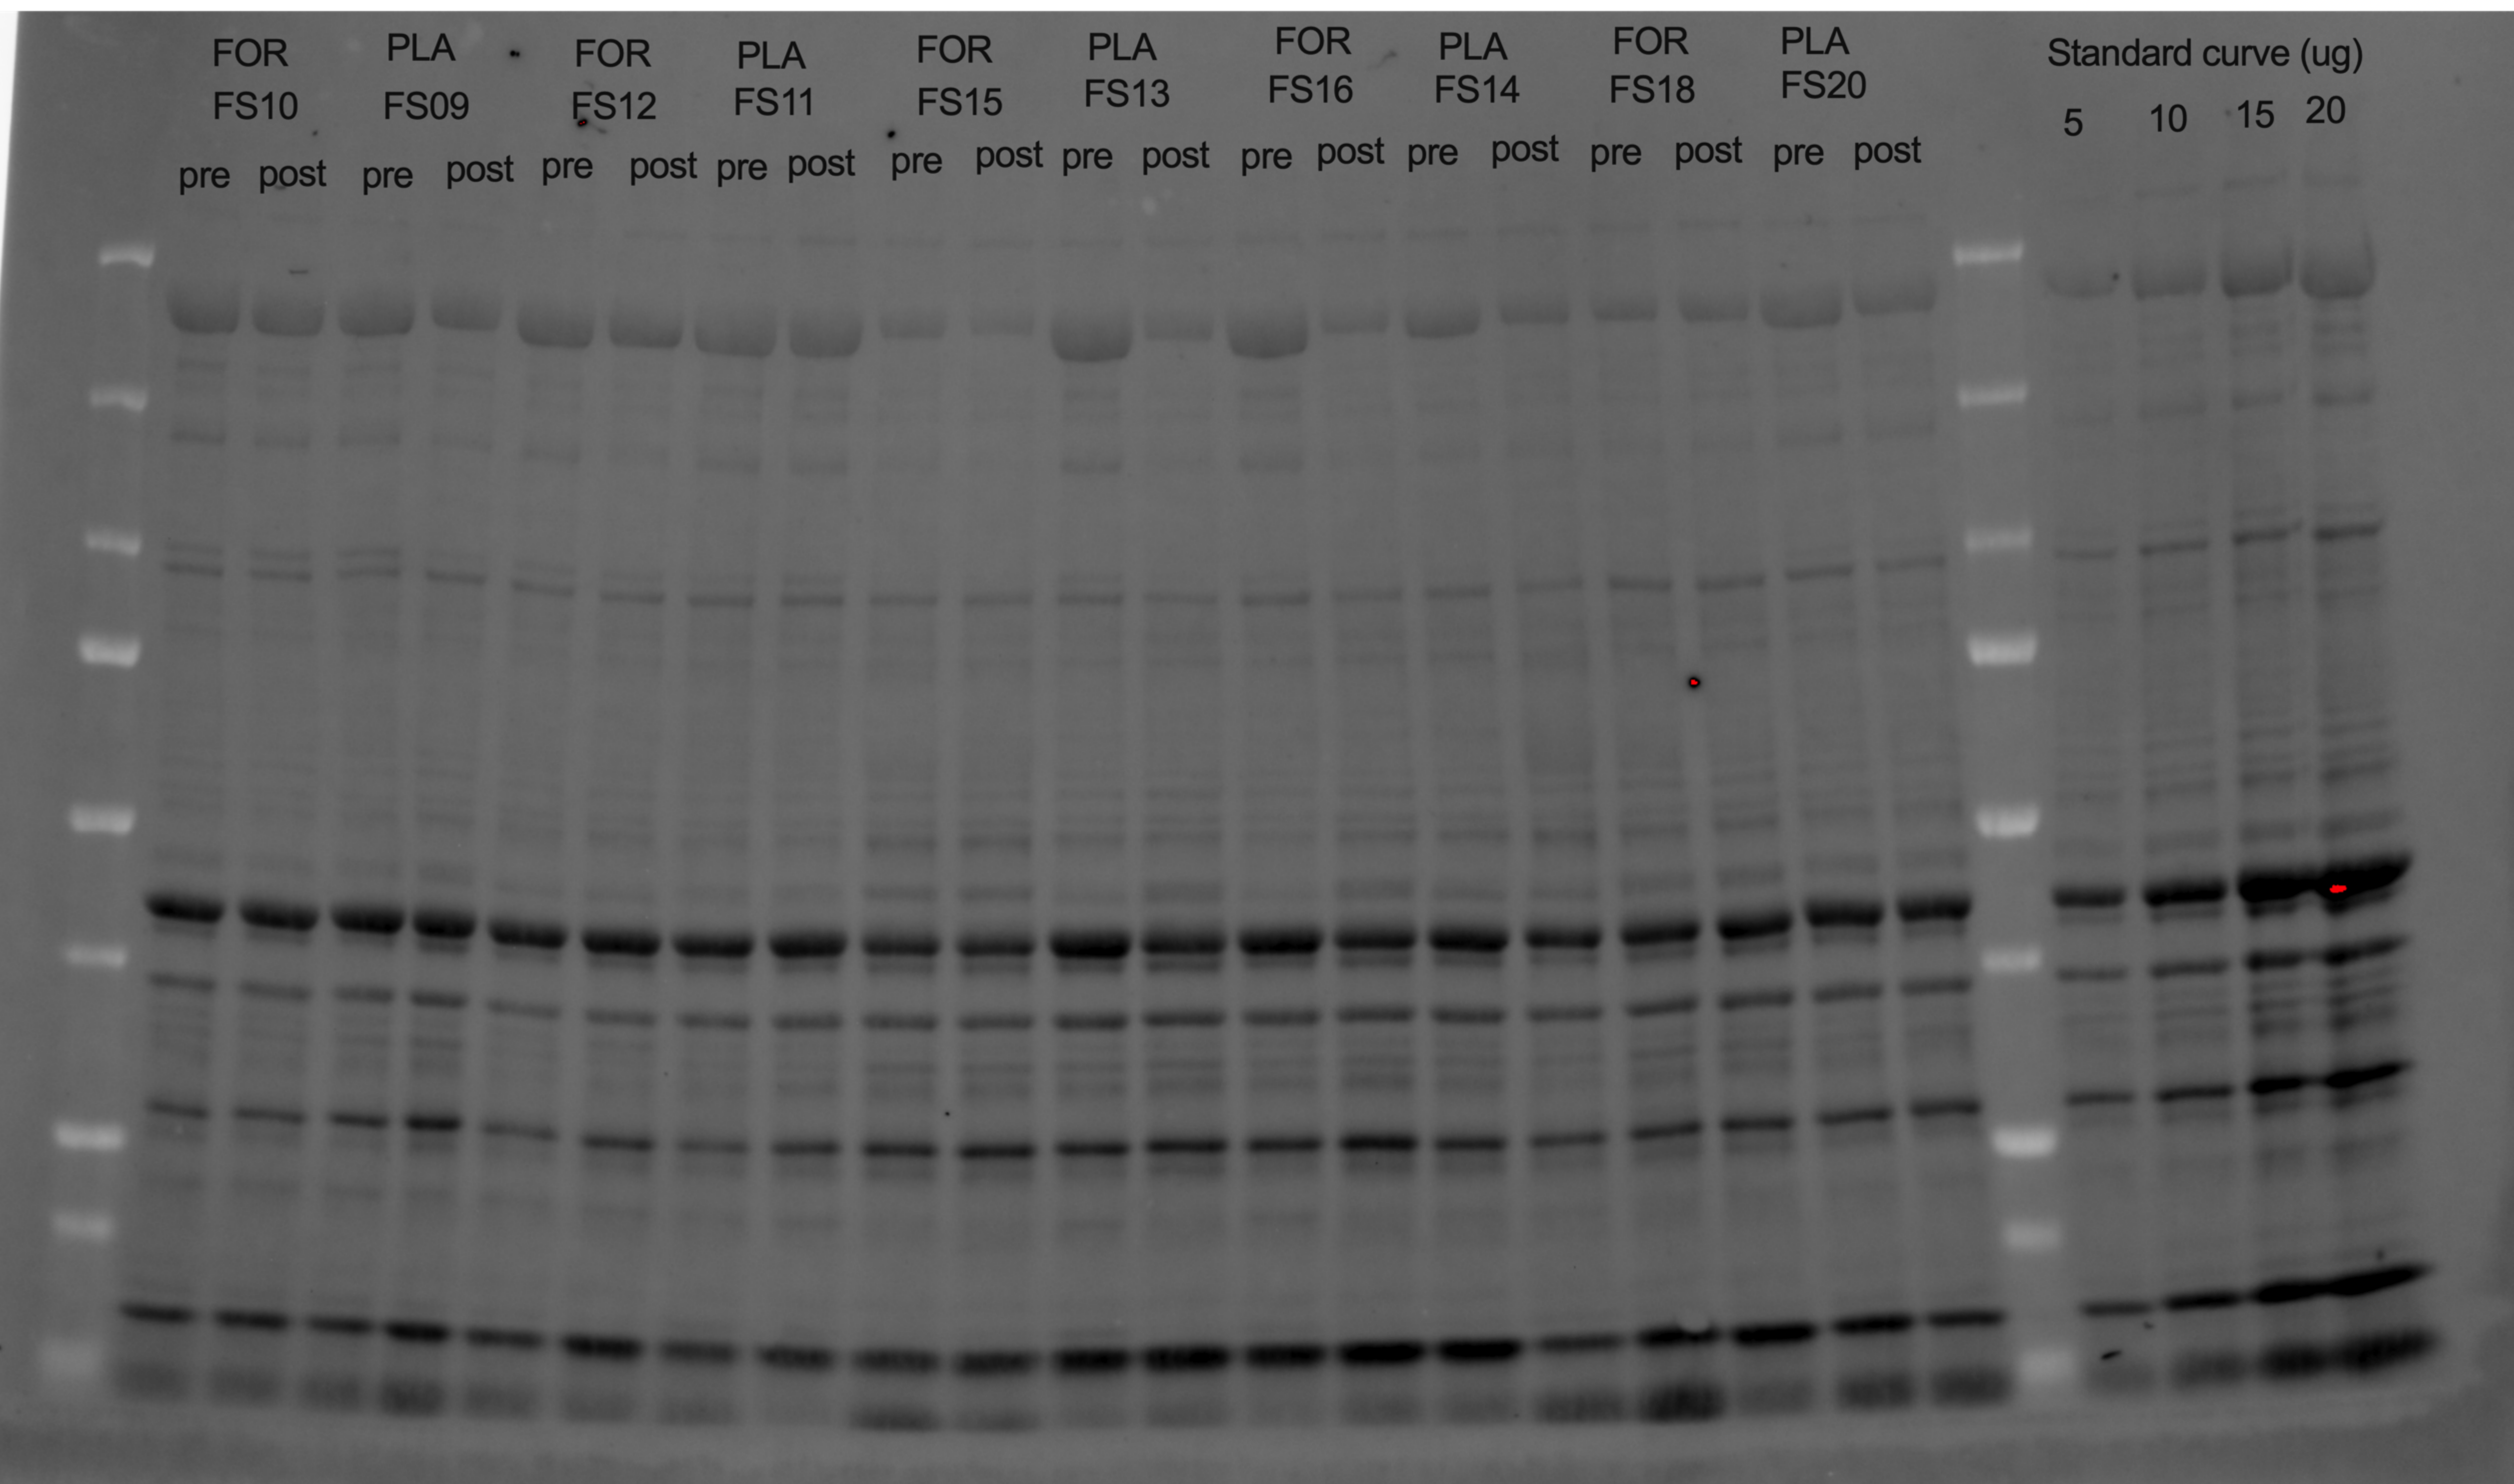

Total mTOR

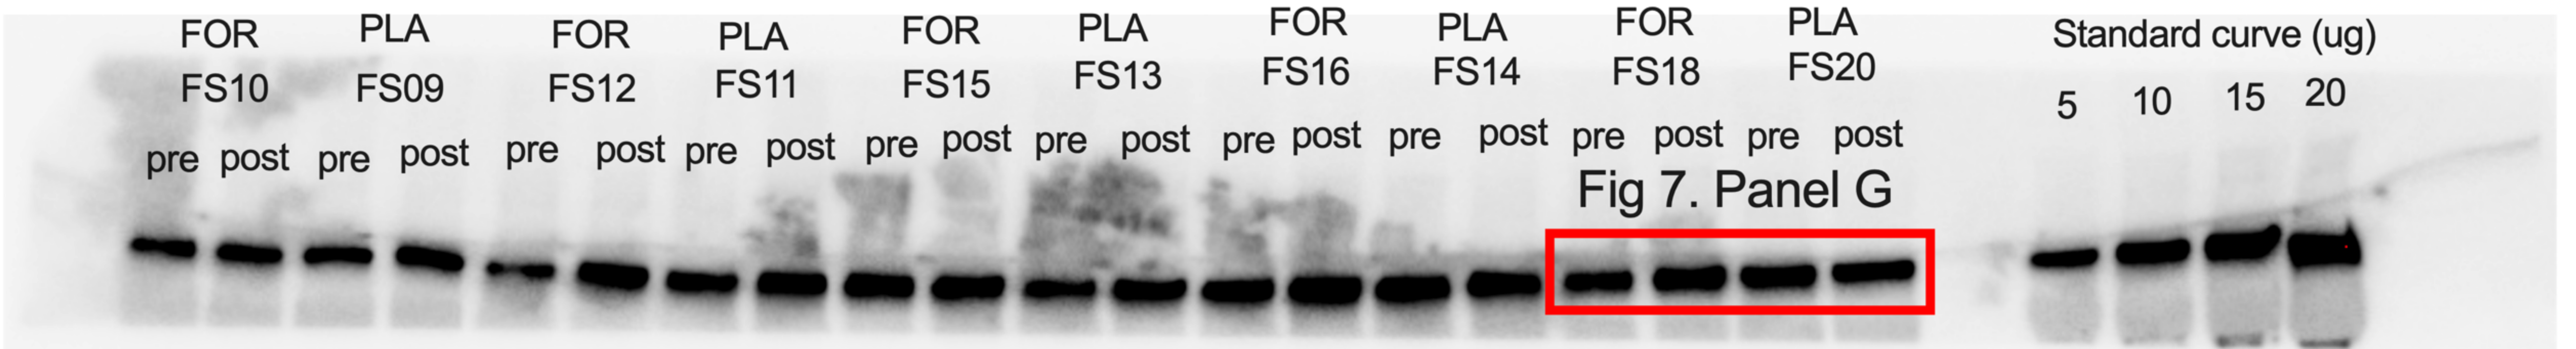

Total p70S6K

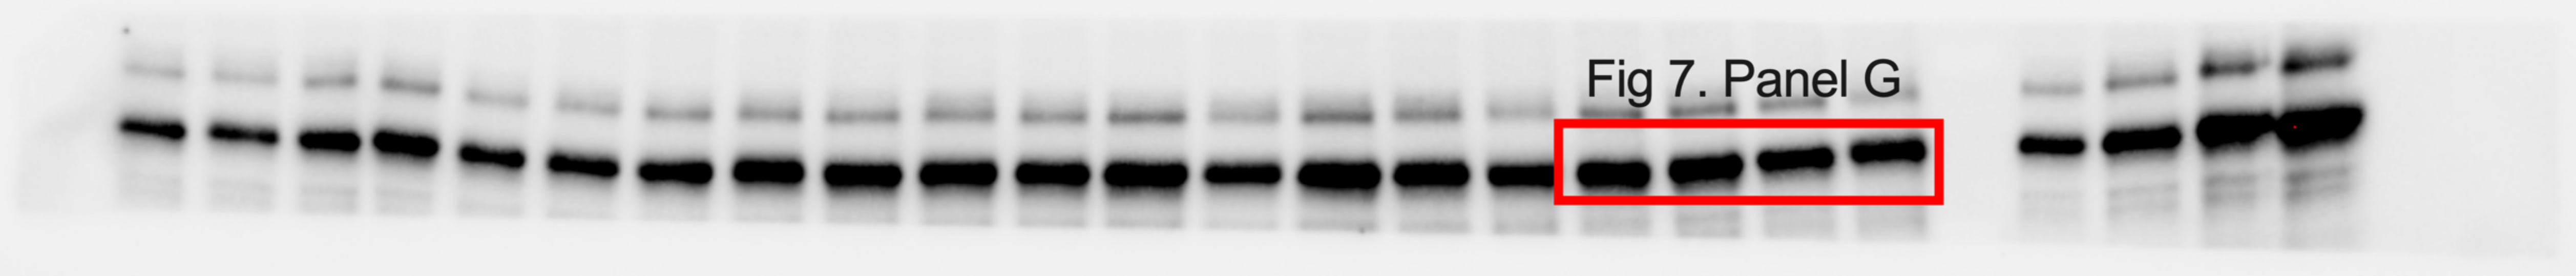

Total S6K

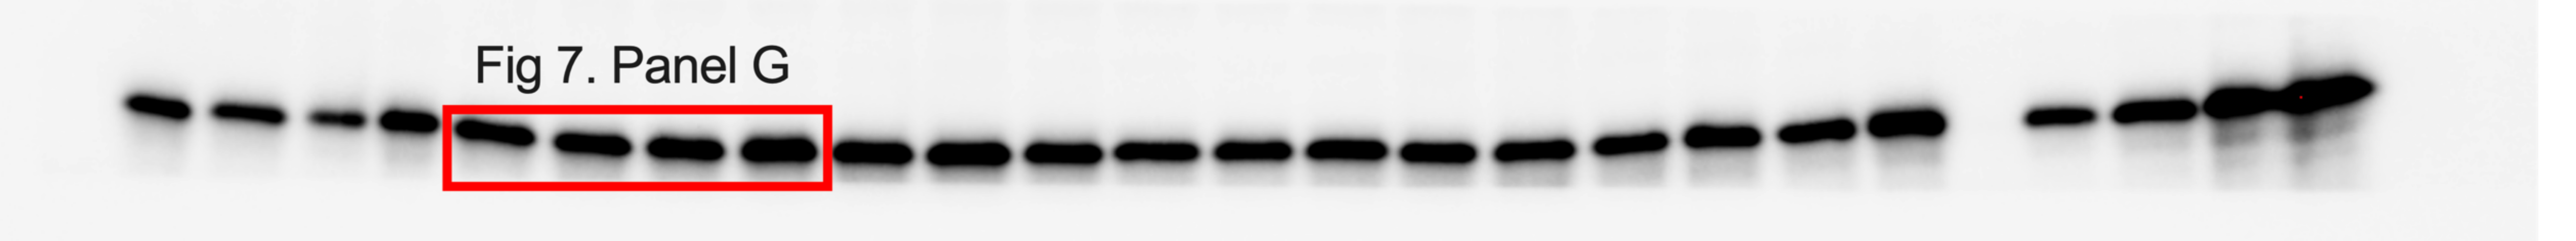

Total 4EBP1

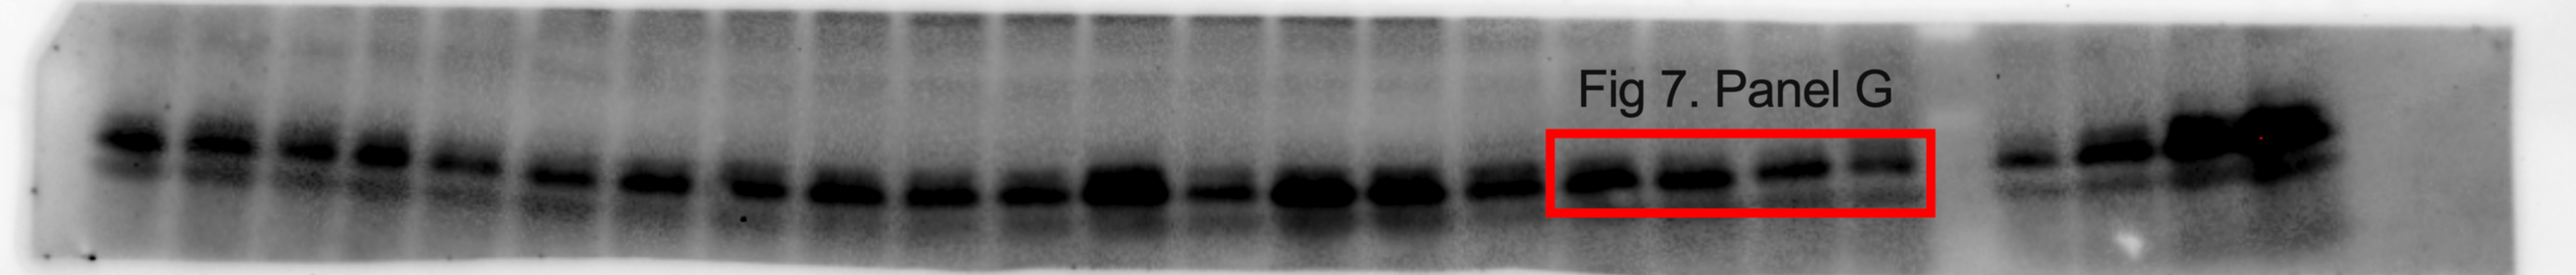

Total protein content for normalization (Phospho form)

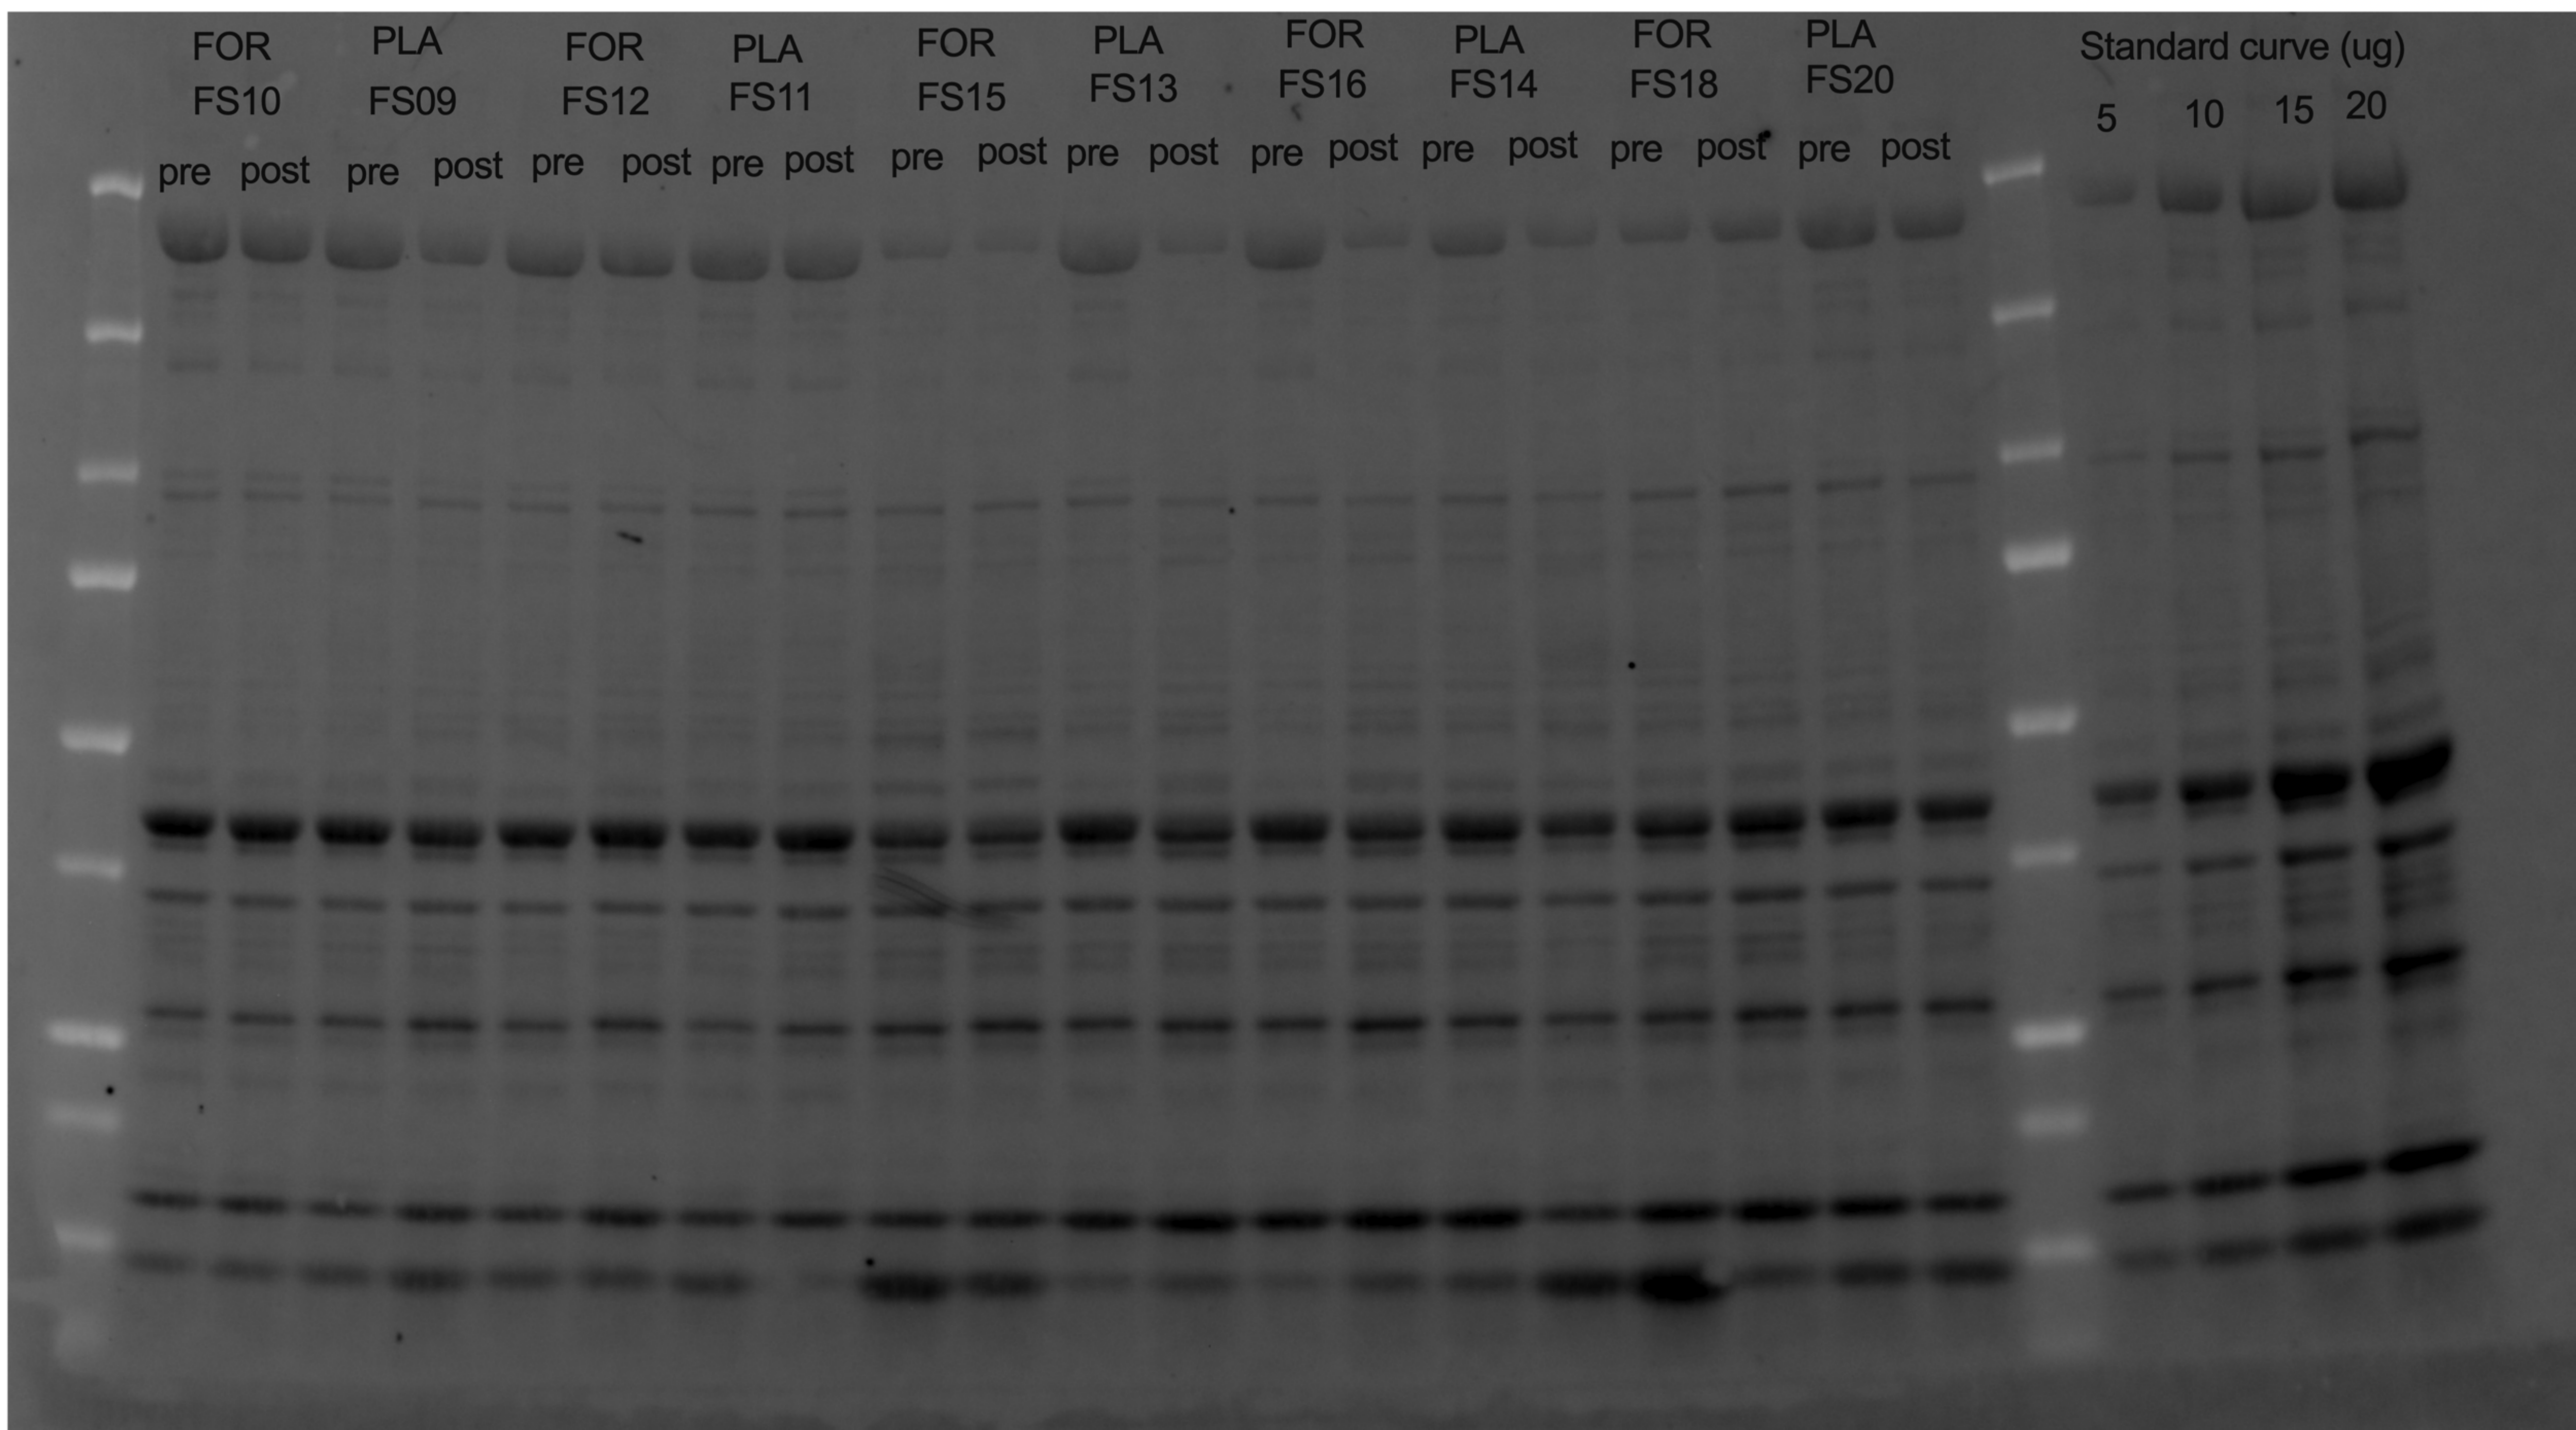

Phospho mTOR

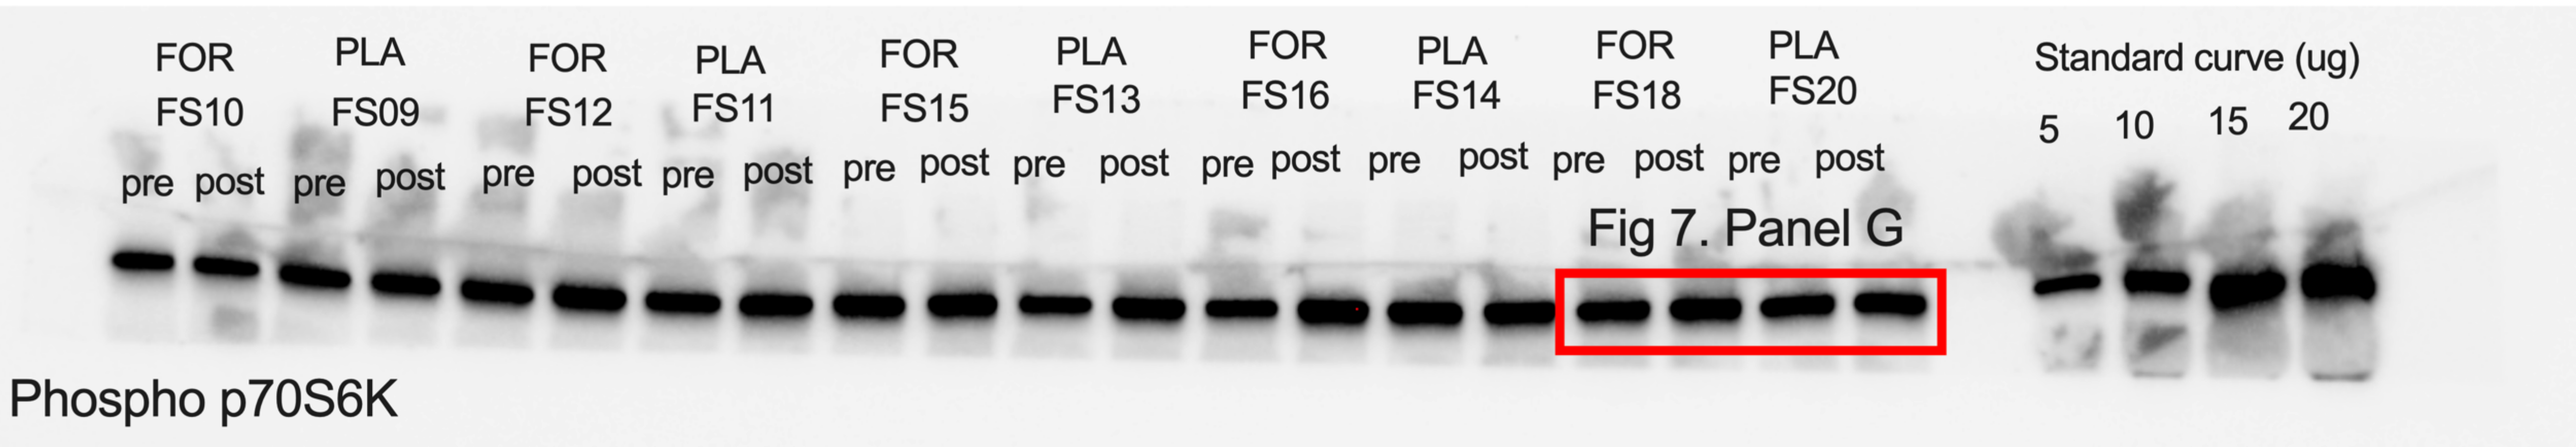

Phospho p70S6K

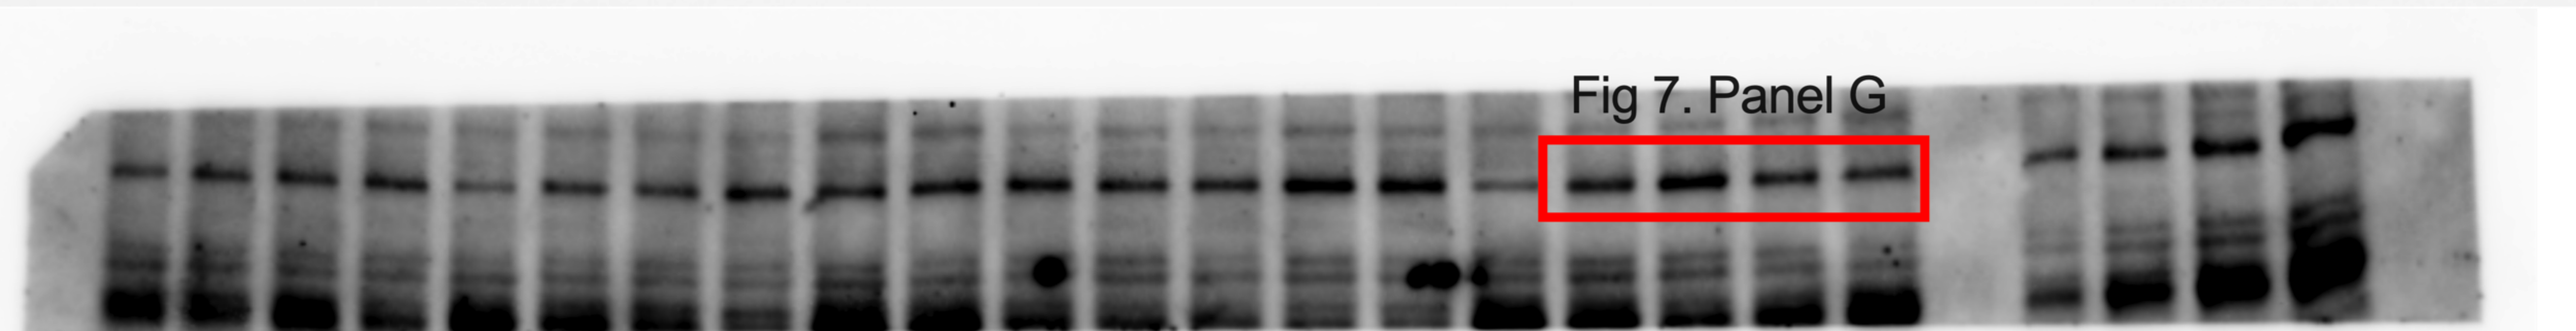

Phospho S6K

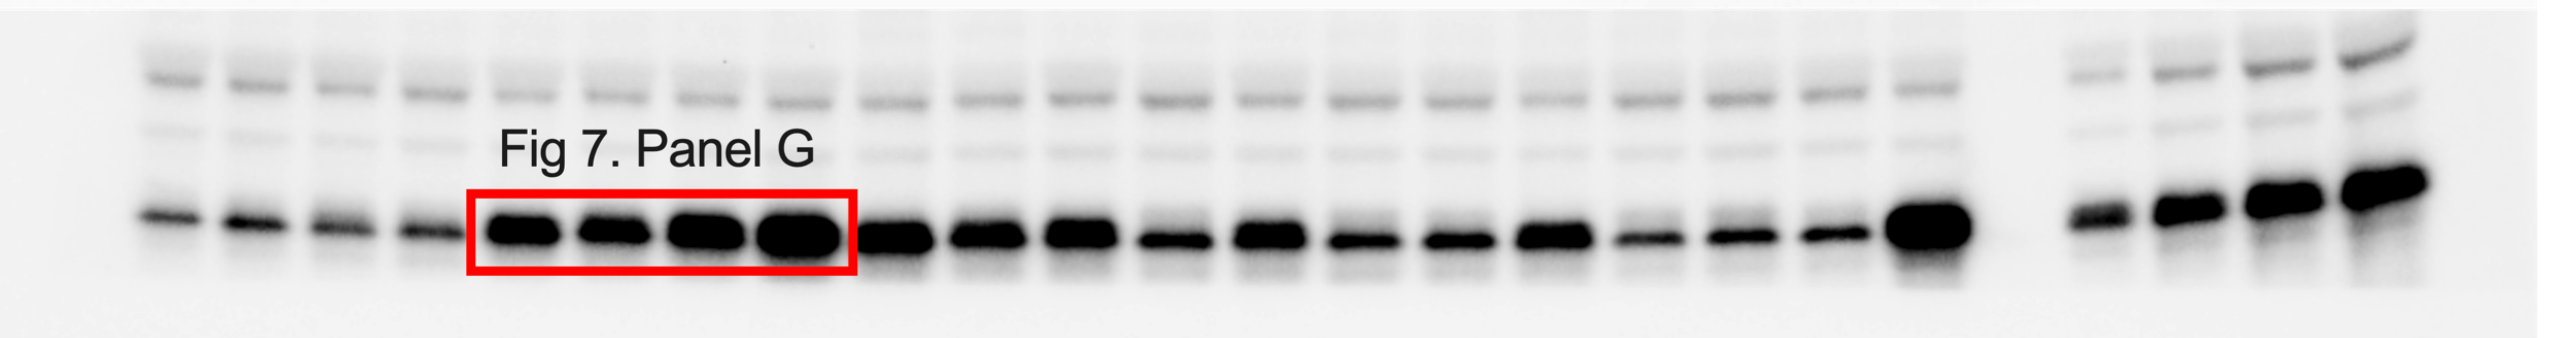

Phospho 4EBP1

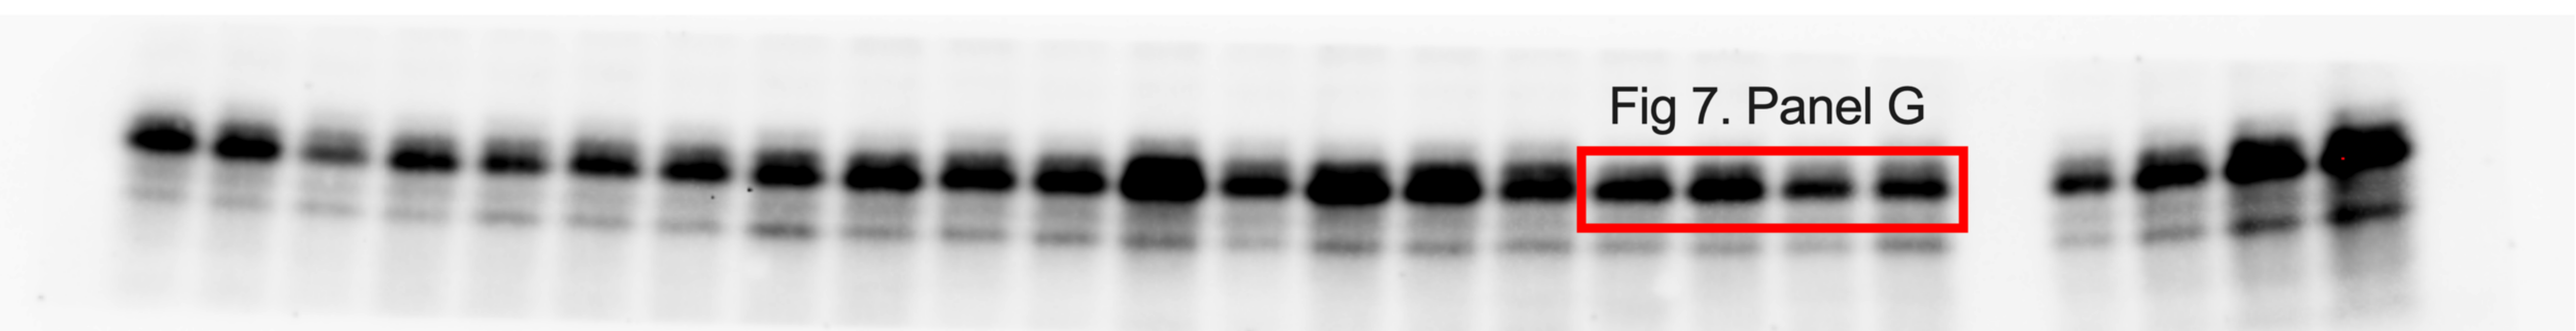

Total protein content for normalization (Total form)

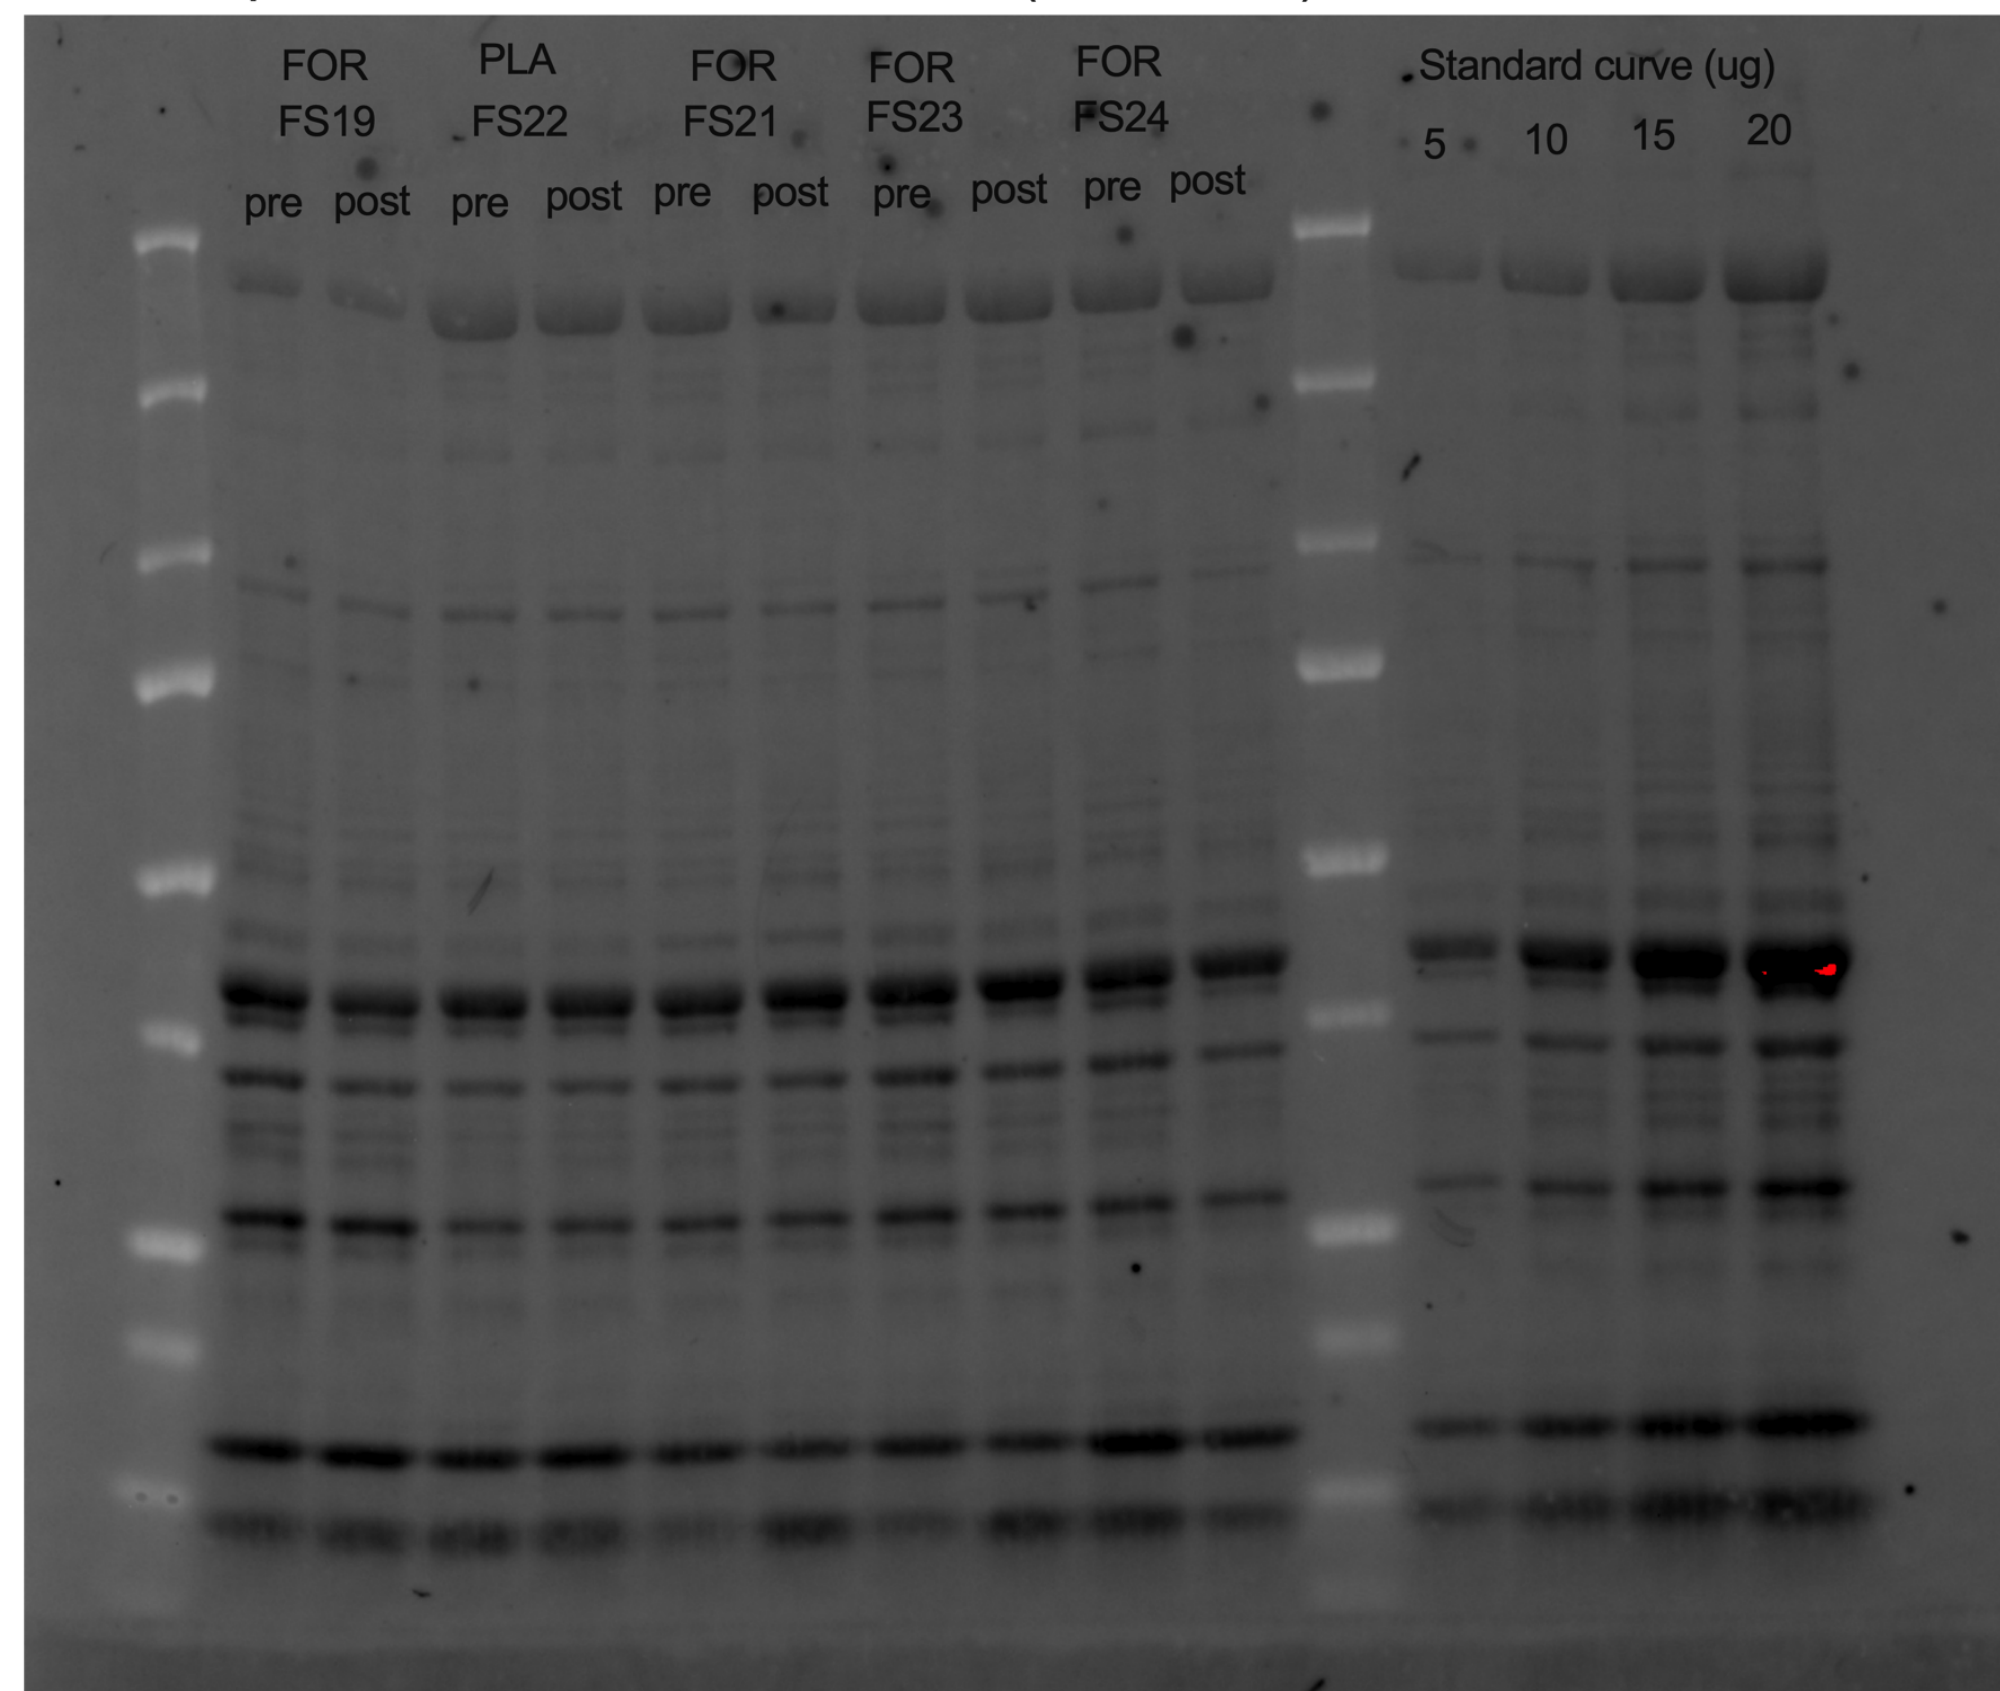

Total mTOR

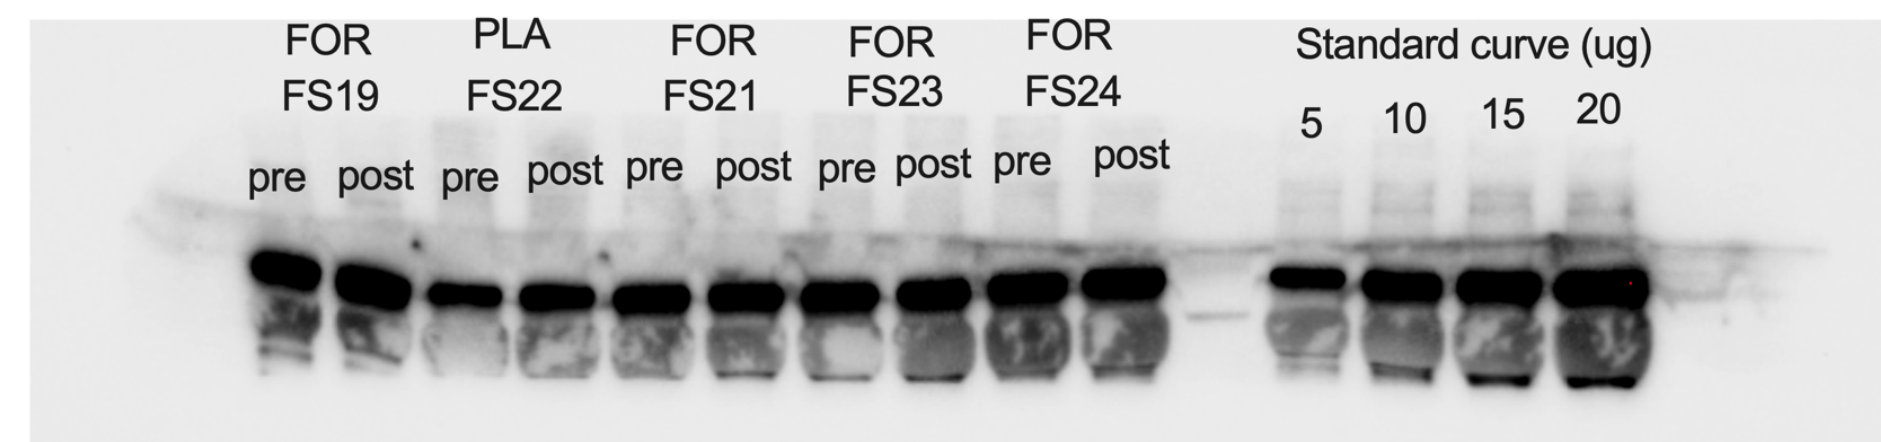

Total p70S6K

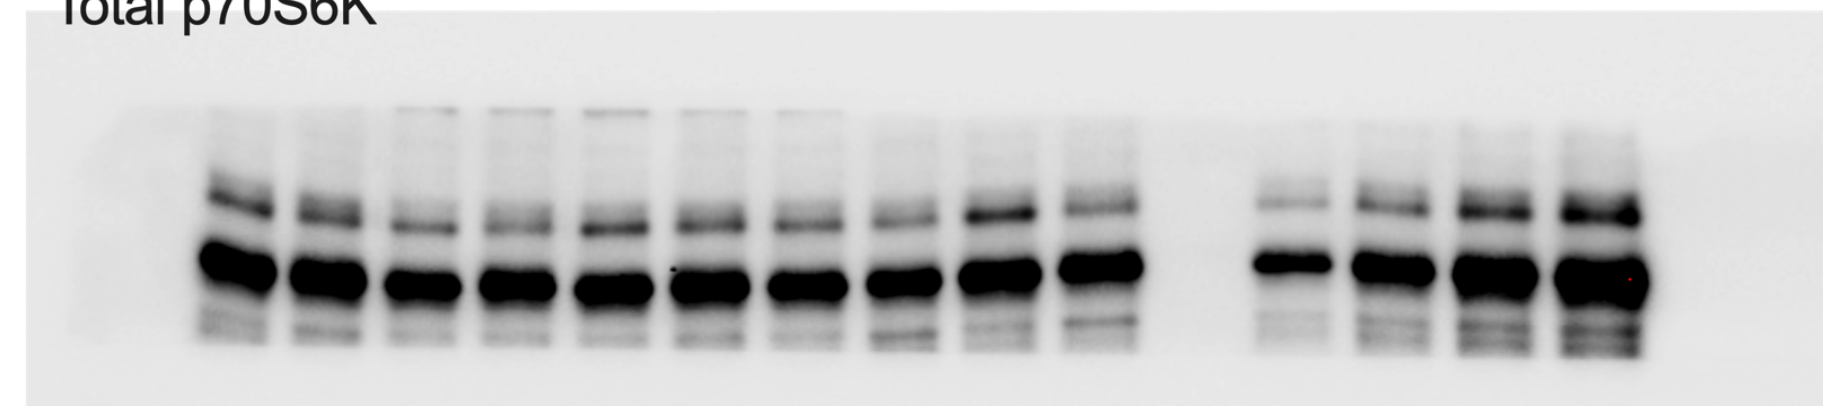

Total S6K

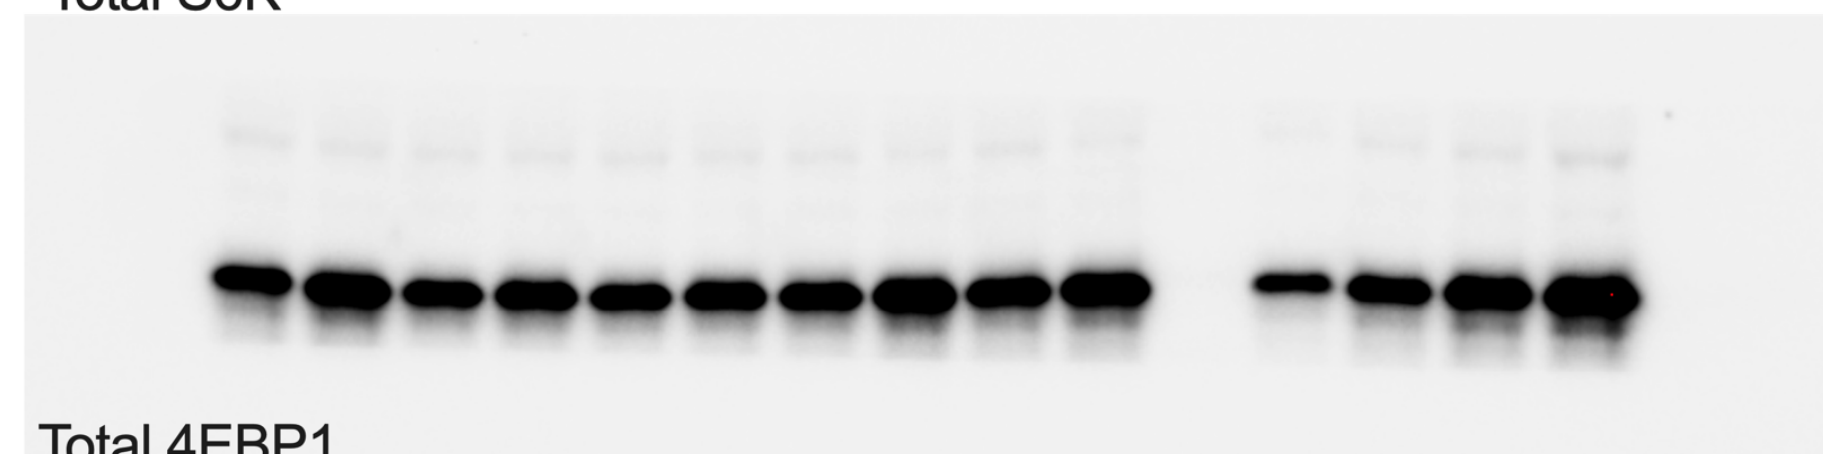

Total 4EBP1

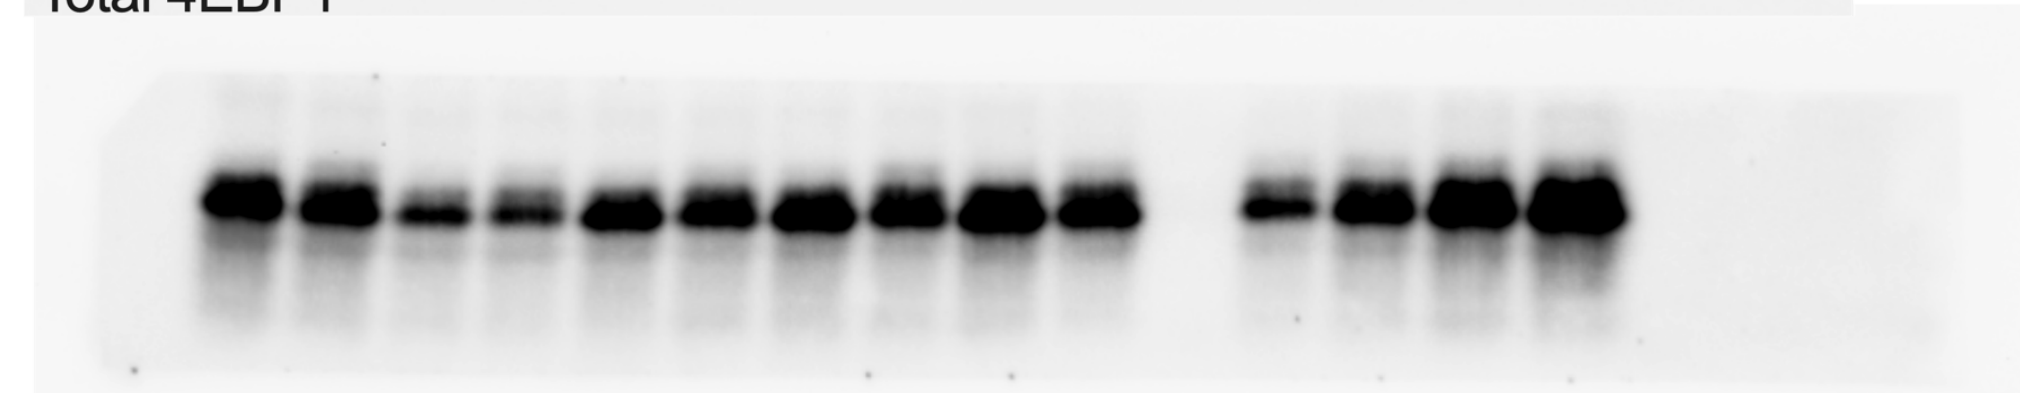

Total protein content for normalization (**Phospho form**)

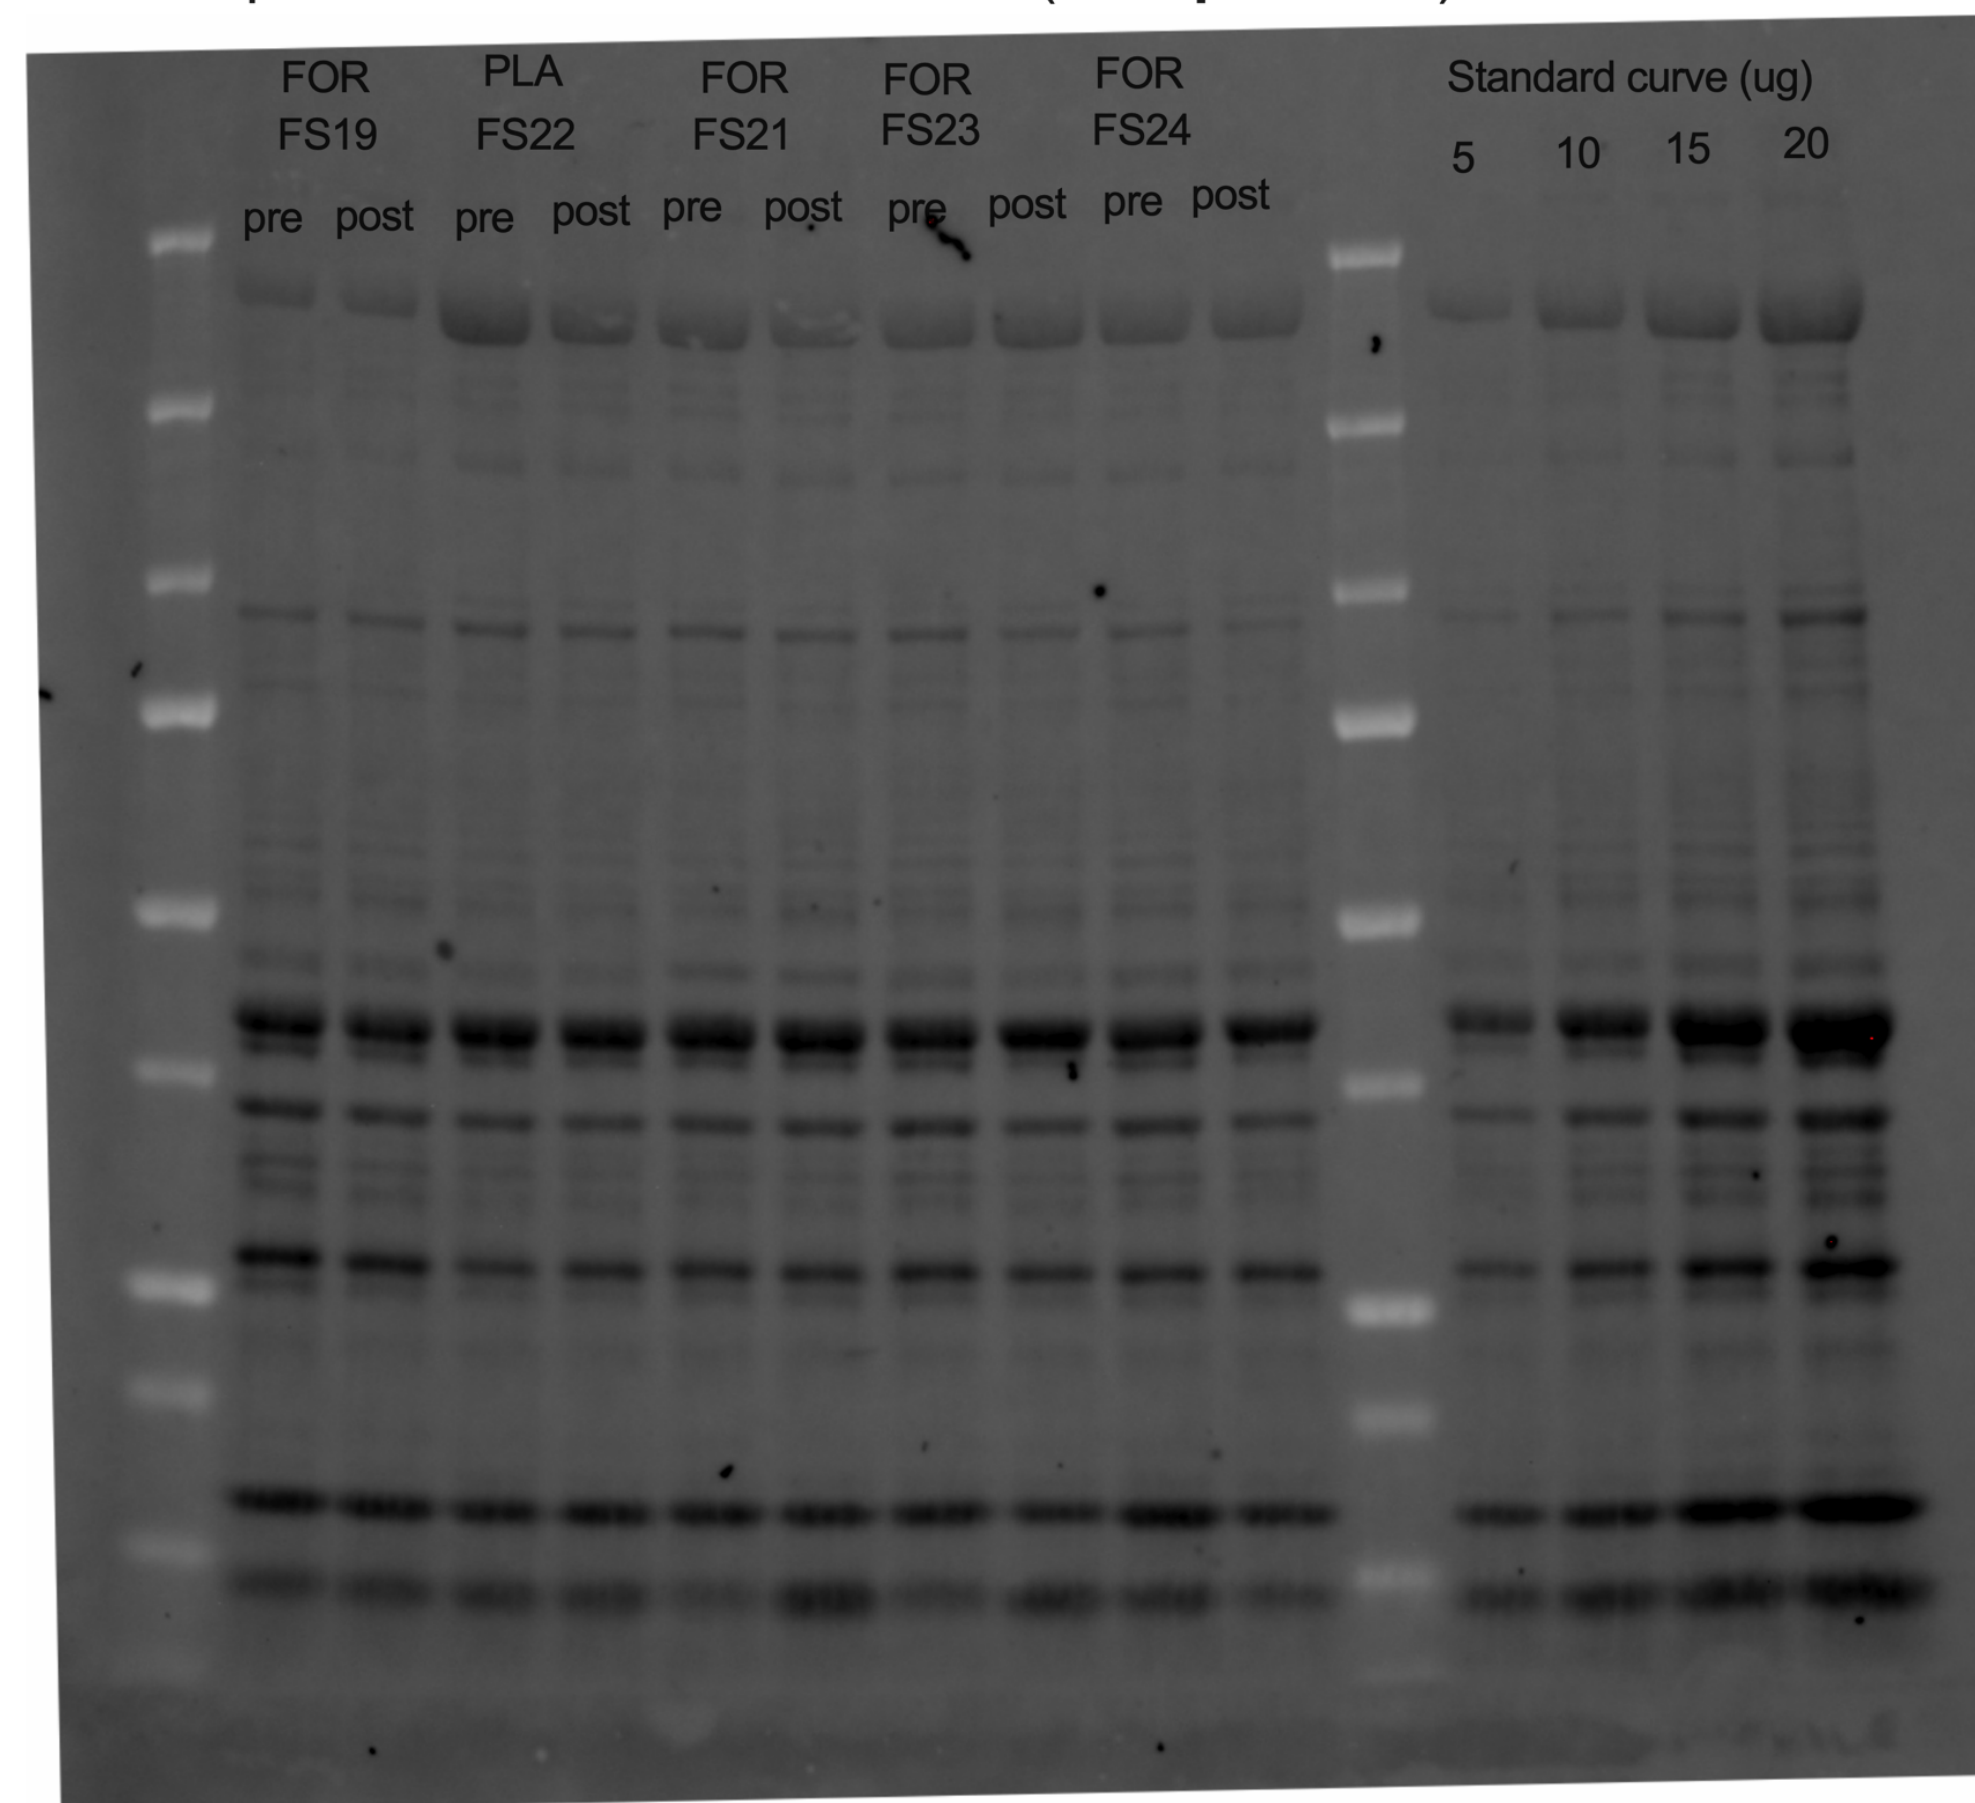

Phospho mTOR

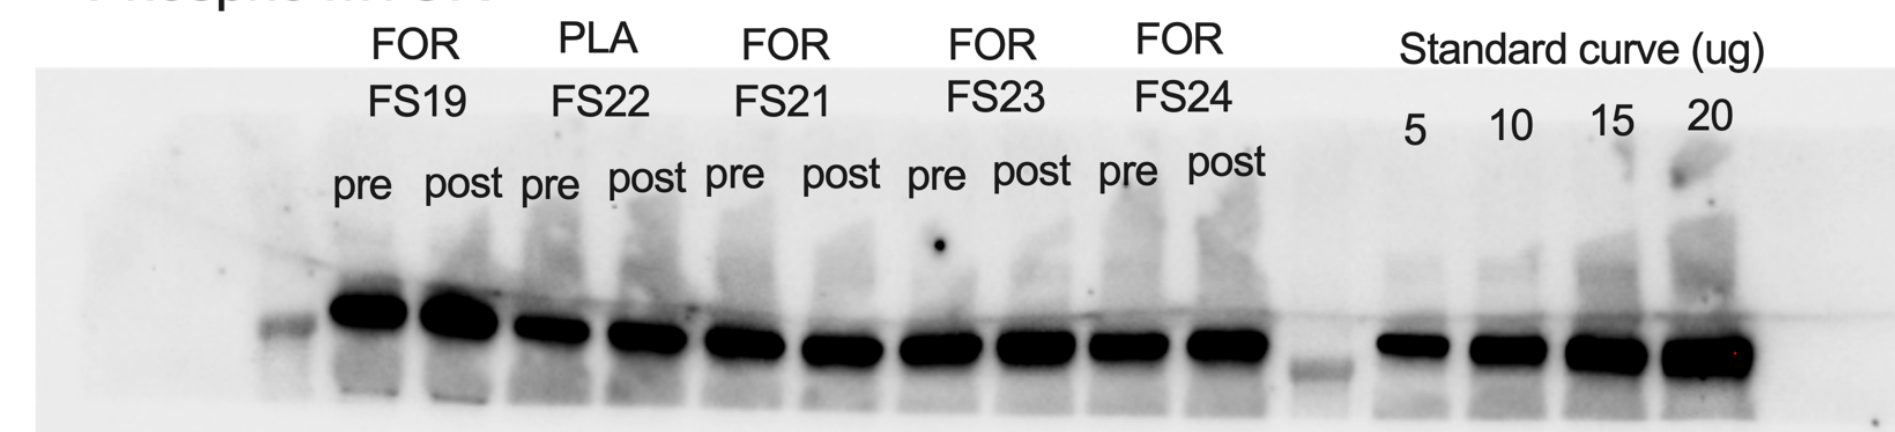

Phospho p70S6K

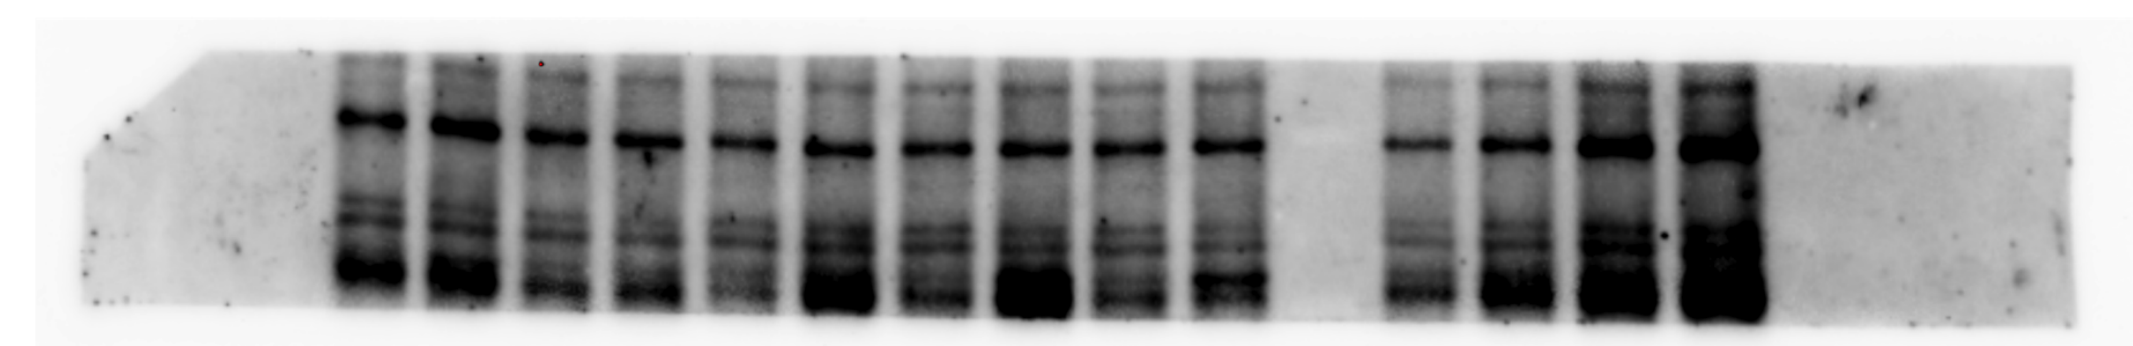

Phospho S6K

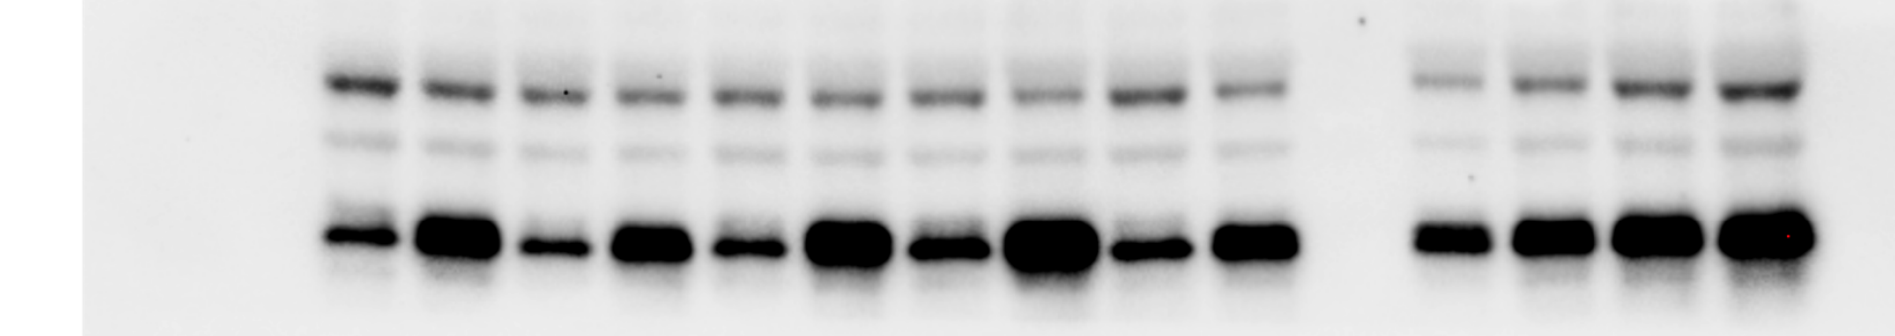

Phospho 4EBP1

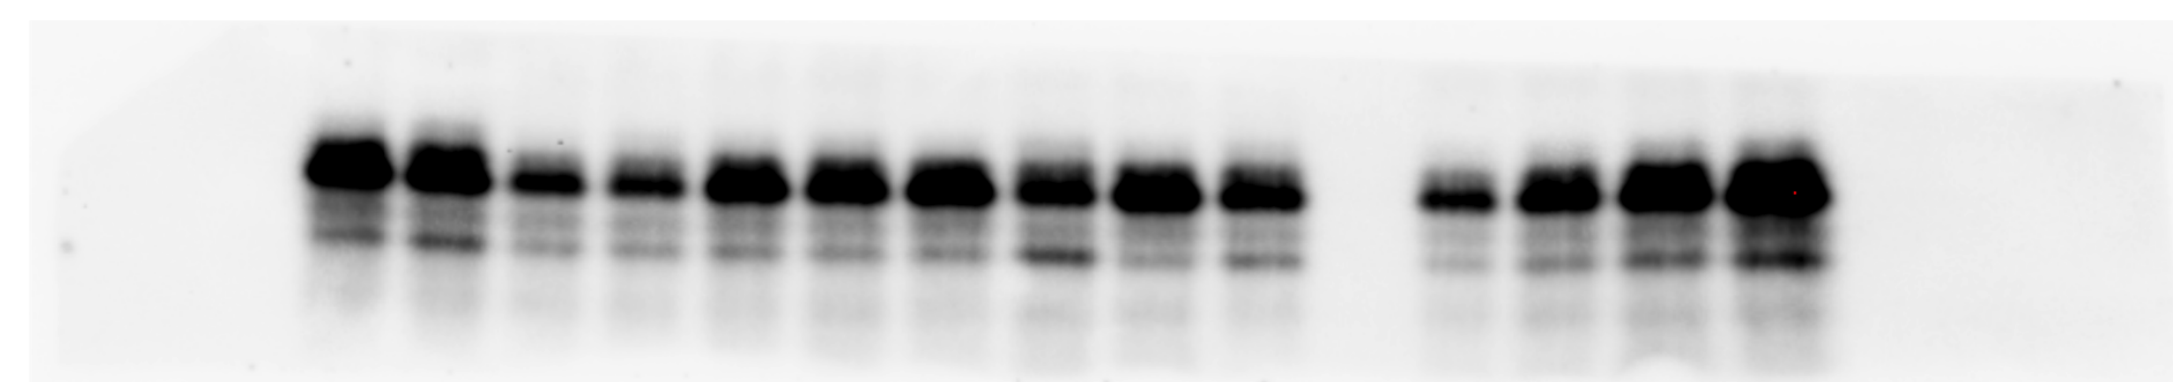

Supplement: pone.0286222.s006.pdf [file pone.0286222.s006.pdf]
